# Supplementary material
Source: PubMed Central journal article supplement (PMC6640984)
Supplement: ao6b00342_si_001.pdf [file ao6b00342_si_001.pdf]

## Supporting Information

### **The Tunable Surface Property of the Temperature-Responsive Polymer-Modified Liposomes Induces Faster Cellular Uptake**

Jian Wang<sup>†</sup>, Eri Ayano<sup>†</sup>, Yoshie Maitani<sup>†</sup>, Hideko Kanazawa\*<sup>†</sup>

<sup>†</sup>Faculty of Pharmacy, Keio University, 1-5-30 Shibakoen, Minato, Tokyo 105-8512, Japan

[kanazawa-hd@pha.keio.ac.jp](mailto:kanazawa-hd@pha.keio.ac.jp)

| Contents                                   | Page |
|--------------------------------------------|------|
| P(NIPAAm-co-DMAPAAm)-DOPE characterization | S-2  |
| GPC analysis                               | S-2  |
| Chemical structures                        | S-3  |

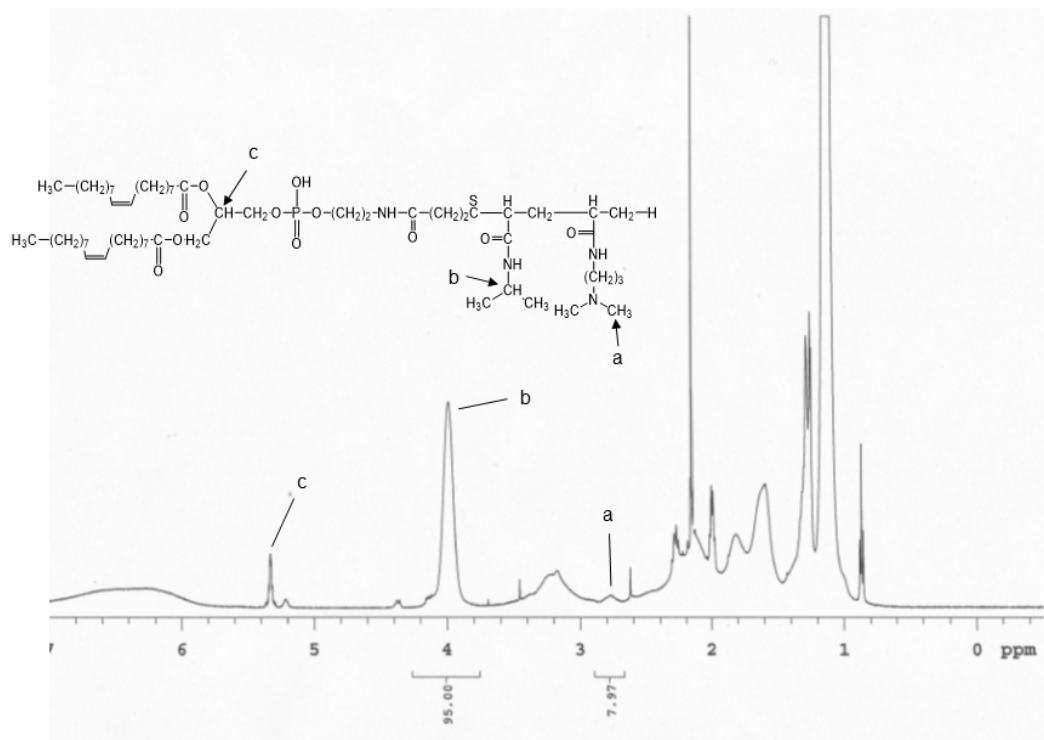

**Figure S1.** P(NIPAAm-co-DMAAAm)-DOPE was determined by  $^1\text{H}$  NMR, by estimation from the integrated proton signals derived from NIPAAm methane (1H, 4.0 ppm), DMAAAm methyl (6H, 2.9 ppm), and DOPE methane (1H, 5.3 ppm) in  $\text{CDCl}_3$

### GPC analysis

The molecular weight of P(NIPAAm-co-DMAAAm) was determined by gel permeation chromatography (GPC) analysis (GPC-8020 system; column, TSK-GEL; mobile phase, DMF containing 10 mM LiCl; TOSOH, Tokyo, Japan), calibrated with polyethylene oxide standards.

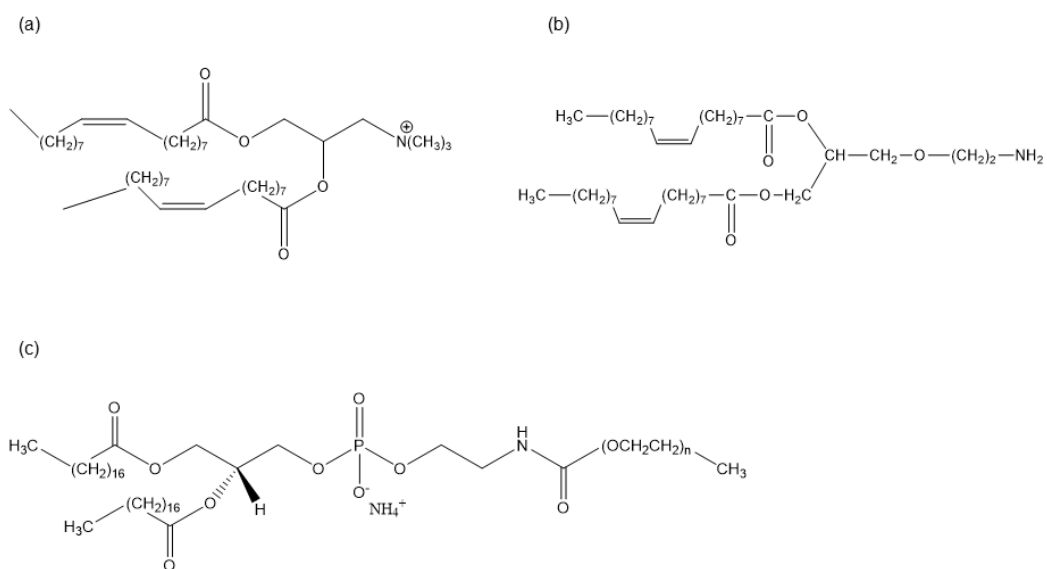

**Figure S2.** The chemical structures of *N*-[1-(2, 3-dioleoyloxy) propyl]-*N,N,N*-trimethyl-ammonium methylsulfate (DOTAP) (a), 1,2-dioleoyl-*sn*-glycero-3-phospho-ethanolamine (DOPE) (b), and *N*-[methoxy (polyethylene glycol) 2000]-distearoyl phosphatidylethanolamine (PEG-DSPE) (c)
